# Supplementary material
Source: PubMed Central journal article supplement (PMC3892699)
Supplement: NIHMS484868-supplement-01.pdf [file NIHMS484868-supplement-01.pdf]

## Supporting Information

### **Protective activity of (1S,2E,4R,6R,7E,11E)-2,7,11-cembratriene-4,6-diol analogues against diisopropylfluorophosphate neurotoxicity: Preliminary structure-activity relationship and pharmacophore modeling**

Vesna A. Eterović<sup>a\*</sup>, Angelie Del Valle-Rodriguez<sup>a</sup>, Dinely Pérez<sup>a</sup>, Marimée Carrasco<sup>a</sup>,  
Mohammad A. Khanfar<sup>b</sup>, Khalid A. El Sayed<sup>c\*</sup>, Pedro A. Ferchmin<sup>a</sup>

<sup>a</sup>*Department of Biochemistry, School of Medicine, Universidad Central del Caribe, Bayamón, PR 00960, USA*

<sup>b</sup>*Department of Basic Pharmaceutical Sciences, Faculty of Pharmacy, The University of Jordan, Amman, 11942, Jordan*

<sup>c</sup>*Department of Basic Pharmaceutical Sciences, College of Pharmacy, University of Louisiana at Monroe, Monroe, LA, 71201, USA*

\* To whom Correspondence should be addressed.

KA El Sayed (Medicinal Chemistry) Telephone 318-342-1725. Fax: 318-342-1737. E-mail:  
[elsayed@ulm.edu](mailto:elsayed@ulm.edu)

VA Eterovic (Biology) Telephone 787-798-3001 X2032. Fax: 787-786-6285 Email:  
vesna.eterovic@gmail.com

**Table 1.**  $^{13}\text{C}$  and  $^1\text{H}$  NMR Data of Cembranoids **1** and **2**.<sup>a</sup>

| position | <b>1</b> <sup>1,2</sup> |                            | <b>2</b> <sup>2,3</sup> |                                              |
|----------|-------------------------|----------------------------|-------------------------|----------------------------------------------|
|          | $\delta_{\text{C}}$     | $\delta_{\text{H}}$        | $\delta_{\text{C}}$     | $\delta_{\text{H}}$                          |
| 1        | 47.1, CH                | 1.66, m                    | 48.8, CH                | 1.70, m                                      |
| 2        | 131.5, CH               | 5.24, ddq (15.8, 8.8, 1.8) | 128.4, CH               | 5.52, dd (9.1, 15.4)                         |
| 3        | 137.3, CH               | 5.45, d (15.8)             | 140.0, CH               | 5.42, d (15.4)                               |
| 4        | 71.1, qC                | -                          | 74.2, qC                | -                                            |
| 5        | 52.2, CH <sub>2</sub>   | 2.20, m 1.91, m            | 46.8, CH <sub>2</sub>   | 1.80, dd (2.5, 14.3)<br>2.22, dd (5.8, 14.3) |
| 6        | 64.7, CH                | 4.85, dd (9.8, 9.0)        | 68.4, CH                | 4.60, m                                      |
| 7        | 130.1, CH               | 5.47, d (9.8)              | 128.3, CH               | 5.56, brd (9.8)                              |
| 8        | 136.0, qC               | -                          | 136.9, qC               | -                                            |
| 9        | 38.2, CH <sub>2</sub>   | 2.25, m, 2.20, m           | 36.1, CH <sub>2</sub>   | 1.85, m                                      |
| 10       | 24.5, CH <sub>2</sub>   | 2.13, 2H, m                | 29.4, CH <sub>2</sub>   | 1.82, m; 2.22, m                             |
| 11       | 128.2, CH               | 5.28, m                    | 64.1, CH                | 4.31, dd (6.2, 9.8)                          |
| 12       | 136.8, qC               | -                          | 148.0, qC               | -                                            |
| 13       | 29.9, CH <sub>2</sub>   | 2.37, m, 1.90, m           | 34.7, CH <sub>2</sub>   | 1.75, m; 2.15, m                             |
| 14       | 31.1, CH <sub>2</sub>   | 1.45, 2H, m                | 28.6, CH <sub>2</sub>   | 1.35, m; 1.65, m                             |
| 15       | 32.1, CH                | 1.56, m                    | 33.3, CH                | 1.60, m                                      |
| 16       | 19.1, CH <sub>3</sub>   | 0.99, 3H, d (6.6)          | 19.3, CH <sub>3</sub>   | 0.85, 3H, d (6.6)                            |
| 17       | 20.8, CH <sub>3</sub>   | 0.84, 3H, d (6.6)          | 20.9, CH <sub>3</sub>   | 0.88, 3H, d (6.6)                            |
| 18       | 28.9, CH <sub>3</sub>   | 1.39, 3H, s                | 32.4, CH <sub>3</sub>   | 1.26, 3H, s                                  |
| 19       | 15.2, CH <sub>2</sub>   | 1.55, 3H, s                | 15.6, CH <sub>3</sub>   | 1.62, 3H, s                                  |
| 20       | 16.1, CH <sub>3</sub>   | 1.76, 3H, s                | 16.6, CH <sub>3</sub>   | 1.50, 3H, s                                  |

<sup>a</sup> In CDCl<sub>3</sub>, 400 MHz for  $^1\text{H}$  and  $^{13}\text{C}$  NMR. Coupling constants ( $J$ ) are in Hz. Carbon multiplicities were determined by APT experiments, qC = quaternary, CH = methine, CH<sub>2</sub> = methylene, CH<sub>3</sub> = methyl carbons.

**Table 2.**  $^{13}\text{C}$  and  $^1\text{H}$  NMR Data of Cembranoids **3** and **4**.<sup>a</sup>

| position | <b>3</b> <sup>4,5</sup>     |                                      | <b>4</b> <sup>4,5</sup>     |                                      |
|----------|-----------------------------|--------------------------------------|-----------------------------|--------------------------------------|
|          | $\delta_{\text{C}}$ , mult. | $\delta_{\text{H}}$ ( <i>J</i> , Hz) | $\delta_{\text{C}}$ , mult. | $\delta_{\text{H}}$ ( <i>J</i> , Hz) |
| 1        | 46.3 CH                     | 1.68, m                              | 46.4 CH                     | 1.64, m                              |
| 2        | 132.1 CH                    | 5.23, dd (15.8,9.0)                  | 131.8 CH                    | 5.41, dd (15.8, 8.1)                 |
| 3        | 134.0 CH                    | 5.07, d (15.8)                       | 133.2 CH                    | 5.28, d (15.8)                       |
| 4        | 75.5 qC                     | -                                    | 77.1 qC                     | -                                    |
| 5        | 52.8 CH <sub>2</sub>        | 2.07, dd (13.9, 1.8)                 | 55.1 CH <sub>2</sub>        | 2.82, d (11.7)                       |
|          |                             | 1.77, dd (13.9, 3.7)                 |                             | 2.45, d (11.7)                       |
| 6        | 63.5 CH                     | 4.79, ddd (9.6, 3.7, 2.2)            | 200.1 qC                    | -                                    |
| 7        | 133.0 CH                    | 5.25, dq (9.6, 1.8)                  | 127.4 CH                    | 6.13, s                              |
| 8        | 135.0 qC                    | -                                    | 156.1 qc                    | -                                    |
| 9        | 38.3 CH <sub>2</sub>        | 2.0, 2H, m                           | 40.3 CH <sub>2</sub>        | 2.10, 2H, m                          |
| 10       | 22.9 CH <sub>2</sub>        | 1.68, 2H, m                          | 23.9 CH <sub>2</sub>        | 2.22, 2H, m                          |
| 11       | 128.3 CH                    | 5.24, m                              | 123.7 CH                    | 5.00, m                              |
| 12       | 133.1 qC                    | -                                    | 134.2 qC                    | -                                    |
| 13       | 37.3, CH <sub>2</sub>       | 2.20, m 1.93, m                      | 37.1 CH <sub>2</sub>        | 2.11, 2H, m                          |
| 14       | 22.1, CH <sub>2</sub>       | 1.42, 2H, m                          | 27.6 CH <sub>2</sub>        | 1.44, 2H, m                          |
| 15       | 32.9, CH                    | 1.51, m                              | 32.8 CH                     | 1.55, m                              |
| 16       | 20.2 CH <sub>3</sub>        | 0.84, 3H, d (6.25)                   | 19.3 CH <sub>3</sub>        | 0.80, 3H, d (6.6)                    |
| 17       | 20.4 CH <sub>3</sub>        | 0.85, 3H, d (6.25)                   | 20.5 CH <sub>3</sub>        | 0.83, 3H, d (6.6)                    |
| 18       | 22.9 CH <sub>3</sub>        | 1.26, 3H, s                          | 24.7 CH <sub>3</sub>        | 1.31, 3H, s                          |
| 19       | 16.0 CH <sub>3</sub>        | 1.64, 3H, d (1.8)                    | 18.4 CH <sub>3</sub>        | 2.02, 3H, d (1.1)                    |
| 20       | 15.1 CH <sub>3</sub>        | 1.50, 3H, s                          | 15.6 CH <sub>3</sub>        | 1.56, 3H, s                          |
| 21       | 50.2 CH <sub>3</sub>        | 3.12, 3H, s                          | 50.2 CH <sub>3</sub>        | 3.24 3H, s                           |

<sup>a</sup>In CDCl<sub>3</sub>, 400 MHz for  $^1\text{H}$  and  $^{13}\text{C}$  NMR. Coupling constants (*J*) are in Hz. Carbon multiplicities were determined by APT experiments, qC = quaternary, CH = methine, CH<sub>2</sub> = methylene, CH<sub>3</sub> = methyl carbons.

**Table 3.**  $^{13}\text{C}$  and  $^1\text{H}$  NMR Data of Cembranoids **5** and **6**.<sup>a</sup>

| position        | <b>5</b> <sup>4</sup>       |                                              | <b>6</b> <sup>4</sup>       |                                      |
|-----------------|-----------------------------|----------------------------------------------|-----------------------------|--------------------------------------|
|                 | $\delta_{\text{C}}$ , mult. | $\delta_{\text{H}}$ ( <i>J</i> , Hz)         | $\delta_{\text{C}}$ , mult. | $\delta_{\text{H}}$ ( <i>J</i> , Hz) |
| 1               | 47.1 CH                     | 1.65, m                                      | 47.0 CH                     | 1.64, 1H, m                          |
| 2               | 133.4 CH                    | 5.17, dd (15.8,8.0)                          | 133.7 CH                    | 5.16, 1H, dd (15.8,8.0)              |
| 3               | 135.1 CH                    | 5.22, d (15.8)                               | 137.9 CH                    | 5.24, d (15.8)                       |
| 4               | 75.7 qC                     | -                                            | 75.5 qC                     | -                                    |
| 5               | 52.6 CH <sub>2</sub>        | 2.07, dd (13.9, 1.8)<br>1.92, dd (13.9, 3.7) | 49.7 CH <sub>2</sub>        | 2.09, dd (13.9, 1.8) 1.84, m         |
| 6               | 64.2 CH                     | 4.82, ddd (9.4, 3.7, 1.8)                    | 68.0 CH                     | 5.83, dt (8.8, 1.6)                  |
| 7               | 133.3 CH                    | 5.31, d (9.9)                                | 129.4 CH                    | 5.21, 1H, d (9.9)                    |
| 8               | 133.0 qC                    | -                                            | 137.4 qC                    | -                                    |
| 9               | 35.8 CH <sub>2</sub>        | 2.19, 2H, m                                  | 35.9 CH <sub>2</sub>        | 1.84, 2H, m                          |
| 10              | 25.0 CH <sub>2</sub>        | 2.27, 2H, dt, (10.6, 2.5)                    | 25.1 CH <sub>2</sub>        | 1.48, 2H, m                          |
| 11              | 61.0 CH                     | 2.82, dd (7.7, 2.5)                          | 61.1 CH                     | 2.81, dd (8.0, 1.5)                  |
| 12              | 59.5 qC                     | -                                            | 59.5 qC                     | -                                    |
| 13              | 36.6 CH <sub>2</sub>        | 2.19, 2H, m                                  | 36.7 CH <sub>2</sub>        | 2.20, 2H, m                          |
| 14              | 28.3 CH <sub>2</sub>        | 1.46, 2H, m                                  | 28.3 CH <sub>2</sub>        | 1.57, 2H, m                          |
| 15              | 33.8 CH                     | 1.56, m                                      | 33.9 CH                     | 1.60, m                              |
| 16              | 20.0 CH <sub>3</sub>        | 0.82, 3H, d (6.5)                            | 18.9 CH <sub>3</sub>        | 0.79, 3H, d (7.0)                    |
| 17              | 20.6 CH <sub>3</sub>        | 0.86, 3H, d (6.5)                            | 20.6 CH <sub>3</sub>        | 0.83, 3H, d (7.0)                    |
| 18              | 22.2 CH <sub>3</sub>        | 1.23, 3H, s                                  | 22.2 CH <sub>3</sub>        | 1.23, 3H, s                          |
| 19              | 16.2 CH <sub>3</sub>        | 1.78, 3H, s                                  | 16.1 CH <sub>3</sub>        | 1.87, 3H, d (1.2)                    |
| 20              | 16.3 CH <sub>3</sub>        | 1.19, 3H, s                                  | 16.6 CH <sub>3</sub>        | 1.19, 3H, s                          |
| 21              | 50.3 CH <sub>3</sub>        | 3.14 3H, s                                   | 50.4 CH <sub>3</sub>        | 3.13 3H, s                           |
| CO              | -                           | -                                            | 170.1 qC                    | -                                    |
| CH <sub>3</sub> | -                           | -                                            | 21.6                        | 2.00, 3H, s                          |

<sup>a</sup>In CDCl<sub>3</sub>, 400 MHz for  $^1\text{H}$  and  $^{13}\text{C}$  NMR. Coupling constants (*J*) are in Hz. Carbon multiplicities were determined by APT experiments, qC = quaternary, CH = methine, CH<sub>2</sub> = methylene, CH<sub>3</sub> = methyl carbons.

**Table 4.**  $^{13}\text{C}$  and  $^1\text{H}$  NMR Data of Cembranoids **7** and **8**.<sup>a</sup>

| position | <b>7</b> <sup>4</sup>       |                                              | <b>8</b> <sup>1,6,7</sup>   |                                      |
|----------|-----------------------------|----------------------------------------------|-----------------------------|--------------------------------------|
|          | $\delta_{\text{C}}$ , mult. | $\delta_{\text{H}}$ ( <i>J</i> , Hz)         | $\delta_{\text{C}}$ , mult. | $\delta_{\text{H}}$ ( <i>J</i> , Hz) |
| 1        | 46.9 CH                     | 1.47, m                                      | 46.4 CH                     | 1.64, m                              |
| 2        | 134.6 CH                    | 5.18, dd (15.8, 7.3)                         | 131.8 CH                    | 5.41, dd (15.8, 8.1)                 |
| 3        | 135.0 CH                    | 5.24, d (15.8)                               | 133.2 CH                    | 5.28, d (15.8)                       |
| 4        | 76.8 qC                     | -                                            | 77.2 qC                     | -                                    |
| 5        | 49.9 CH <sub>2</sub>        | 2.10, dd (15.0, 3.0)<br>1.82, dd (15.0, 5.1) | 55.6 CH <sub>2</sub>        | 2.84, d (11.6)<br>2.42, d (11.6)     |
| 6        | 64.8 CH                     | 3.95, ddd (8.2, 5.1, 3.0)                    | 201.2 qC                    | -                                    |
| 7        | 69.4 CH                     | 2.82, d (9.1)                                | 127.2 CH                    | 6.13, s                              |
| 8        | 63.5 qC                     | -                                            | 155.1 qc                    | -                                    |
| 9        | 36.7 CH <sub>2</sub>        | 1.98, 2H, m                                  | 40.1 CH <sub>2</sub>        | 2.12, 2H, m                          |
| 10       | 23.0 CH <sub>2</sub>        | 2.07, 2H, m                                  | 23.7 CH <sub>2</sub>        | 2.24, 2H, m                          |
| 11       | 123.7 CH                    | 5.02, m                                      | 123.1 CH                    | 5.02, m                              |
| 12       | 134.6 qC                    | -                                            | 134.0 qC                    | -                                    |
| 13       | 36.4 CH <sub>2</sub>        | 1.89, 2H, m                                  | 37.1 CH <sub>2</sub>        | 2.12, 2H, m                          |
| 14       | 28.2 CH <sub>2</sub>        | 1.63, 2H, m                                  | 27.6 CH <sub>2</sub>        | 1.46, 2H, m                          |
| 15       | 33.0 CH                     | 1.69, m                                      | 32.8 CH                     | 1.59, m                              |
| 16       | 19.7 CH <sub>3</sub>        | 0.82, 3H, d (6.6)                            | 19.1 CH <sub>3</sub>        | 0.81, 3H, d (6.6)                    |
| 17       | 21.0 CH <sub>3</sub>        | 0.87, 3H, d (6.6)                            | 20.0 CH <sub>3</sub>        | 0.85, 3H, d (6.6)                    |
| 18       | 23.0 CH <sub>3</sub>        | 1.32, 3H, s                                  | 24.2 CH <sub>3</sub>        | 1.31, 3H, s                          |
| 19       | 17.7 CH <sub>3</sub>        | 1.34, 3H, s                                  | 18.1 CH <sub>3</sub>        | 2.00, 3H, d (1.1)                    |
| 20       | 14.7 CH <sub>3</sub>        | 1.51, 3H, s                                  | 15.6 CH <sub>3</sub>        | 1.59, 3H, s                          |
| 21       | 50.8 CH <sub>3</sub>        | 3.16 3H, s                                   | -                           | -                                    |

<sup>a</sup>In CDCl<sub>3</sub>, 400 MHz for  $^1\text{H}$  and  $^{13}\text{C}$  NMR. Coupling constants (*J*) are in Hz. Carbon multiplicities were determined by APT experiments, qC = quaternary, CH = methine, CH<sub>2</sub> = methylene, CH<sub>3</sub> = methyl carbons.

**Table 5.**  $^{13}\text{C}$  and  $^1\text{H}$  NMR Data of Cembranoids **9- 11.**<sup>a</sup>

| Position | <b>9</b> <sup>2</sup> |                      | <b>10</b> <sup>2</sup> |                            | <b>11</b> <sup>2</sup> |                      |
|----------|-----------------------|----------------------|------------------------|----------------------------|------------------------|----------------------|
|          | $\delta_{\text{C}}$   | $\delta_{\text{H}}$  | $\delta_{\text{C}}$    | $\delta_{\text{H}}$        | $\delta_{\text{C}}$    | $\delta_{\text{H}}$  |
| 1        | 46.1, CH              | 1.50, m              | 46.0, CH               | 1.55, m                    | 46.5, CH               | 1.51, m              |
| 2        | 130.3, CH             | 5.17, dd (15.8, 9.2) | 130.1, CH              | 5.16, dd, (15.4, 9.2)      | 131.8, CH              | 5.21, dd (15.8, 8.8) |
| 3        | 136.3, CH             | 5.36, d, (15.8)      | 136.5, CH              | 5.36, d, (15.4)            | 136.3, CH              | 5.35, d (15.8)       |
| 4        | 70.9, qC              | -                    | 70.8, qC               | -                          | 71.5, qC               | -                    |
| 5        | 51.4, CH <sub>2</sub> | 2.00, m              | 51.7, CH <sub>2</sub>  | 2.05, m                    | 52.2, CH <sub>2</sub>  | 2.00, m 1.88, m      |
| 6        | 69.3, CH              | 5.60, dd (9.5, 9.0)  | 68.7, CH               | 5.57, dd (9.4, 9.0)        | 64.4, CH               | 4.86, dd (9.6, 9.2)  |
| 7        | 127.1, CH             | 5.27, d (9.9)        | 127.3, CH              | 5.24, d (9.9)              | 126.4, CH              | 5.62, d (9.9)        |
| 8        | 139.6, qC             | -                    | 139.3, qC              | -                          | 133.2, qC              | -                    |
| 9        | 38.9, CH <sub>2</sub> | 2.05, m 2.20, m      | 38.9, CH <sub>2</sub>  | 2.10, m 2.25, m            | 70.9, CH               | 4.23, brs            |
| 10       | 76.1, CH              | 4.10, brd (7.7)      | 75.2, CH               | 3.92, ddd (10.9, 5.3, 2.9) | 38.1, CH <sub>2</sub>  | 2.40, m 2.32, m      |
| 11       | 124.0, CH             | 4.91, m              | 124.2, CH              | 4.90, m                    | 124.7, CH              | 4.99, brt (3.6)      |
| 12       | 133.5, qC             | -                    | 133.1, qC              | -                          | 136.8, qC              | -                    |
| 13       | 36.5, CH <sub>2</sub> | 1.90, m 2.05, m      | 35.9, CH <sub>2</sub>  | 1.90, m                    | 27.9, CH <sub>2</sub>  | 2.04, m, 1.66, m     |
| 14       | 27.5, CH <sub>2</sub> | 1.25, m 1.60, m      | 27.4, CH <sub>2</sub>  | 1.20, m 1.55, m            | 32.0, CH <sub>2</sub>  | 1.40, m 1.31, m      |
| 15       | 33.2, CH              | 1.55, m              | 33.1, CH               | 1.50, m                    | 32.8, CH               | 1.51, m              |
| 16       | 19.5, CH <sub>3</sub> | 0.79, d (6.6)        | 19.5, CH <sub>3</sub>  | 0.79, d (6.6)              | 19.2, CH <sub>3</sub>  | 0.78, 3H, d (6.6)    |
| 17       | 20.5, CH <sub>3</sub> | 0.82, d (6.6)        | 20.4, CH <sub>3</sub>  | 0.80, d (6.6)              | 20.7, CH <sub>3</sub>  | 0.81, 3H, d (6.6)    |
| 18       | 28.3, CH <sub>3</sub> | 1.36, s              | 28.2, CH <sub>3</sub>  | 1.36, s                    | 28.9, CH <sub>3</sub>  | 1.41, 3H, s          |
| 19       | 16.0, CH <sub>3</sub> | 1.48, s              | 15.9, CH <sub>3</sub>  | 1.48, s                    | 15.1, CH <sub>3</sub>  | 1.53, 3H, s          |
| 20       | 15.0, CH <sub>3</sub> | 1.72, s              | 15.0, CH <sub>3</sub>  | 1.71, s                    | 16.1, CH <sub>3</sub>  | 1.69, 3H, s          |

<sup>a</sup>In CDCl<sub>3</sub>, 400 MHz for  $^1\text{H}$  and  $^{13}\text{C}$  NMR. Coupling constants ( $J$ ) are in Hz. Carbon multiplicities were determined by APT experiments, qC = quaternary, CH = methine, CH<sub>2</sub> = methylene, CH<sub>3</sub> = methyl carbons.

**Table 6.**  $^{13}\text{C}$  and  $^1\text{H}$  NMR Data of Cembranoids **12** and **13**.<sup>a</sup>

| position | <b>12</b> <sup>2</sup> |                                | <b>13</b> <sup>2</sup> |                                |
|----------|------------------------|--------------------------------|------------------------|--------------------------------|
|          | $\delta_{\text{C}}$    | $\delta_{\text{H}}$            | $\delta_{\text{C}}$    | $\delta_{\text{H}}$            |
| 1        | 47.5, CH               | 1.63, m                        | 46.5, CH               | 1.51, m                        |
| 2        | 131.8, CH              | 5.24, ddq (15.8, 8.8, 1.8)     | 131.8, CH              | 5.21, dd (15.8, 8.8)           |
| 3        | 137.3, CH              | 5.40, d (15.8)                 | 136.3, CH              | 5.35, d (15.8)                 |
| 4        | 72.1, qC               | -                              | 71.5, qC               | -                              |
| 5        | 52.2, CH <sub>2</sub>  | 2.15, m 1.95, m                | 52.2, CH <sub>2</sub>  | 2.00, m 1.88, m                |
| 6        | 64.4, CH               | 4.82, dd (9.8, 9.0)            | 64.4, CH               | 4.86, dd (9.6, 9.2)            |
| 7        | 130.2, CH              | 5.47, d (9.8)                  | 126.4, CH              | 5.62, d (9.9)                  |
| 8        | 136.2, qC              | -                              | 133.2, qC              | -                              |
| 9        | 38.0, CH <sub>2</sub>  | 2.25, m, 2.20, m               | 70.9, CH               | 4.23, brs                      |
| 10       | 22.5, CH <sub>2</sub>  | 2.33, 2H, m                    | 38.1, CH <sub>2</sub>  | 2.40, m 2.32, m                |
| 11       | 128.0, CH              | 5.28, m                        | 124.7, CH              | 4.99, brt (3.6)                |
| 12       | 136.2, qC              | -                              | 134.8, qC              | -                              |
| 13       | 27.9, CH <sub>2</sub>  | 2.27, m, 1.90, m               | 27.9, CH <sub>2</sub>  | 2.04, m, 1.66, m               |
| 14       | 32.0, CH <sub>2</sub>  | 1.42, 2H, m                    | 32.0, CH <sub>2</sub>  | 1.40, m 1.31, m                |
| 15       | 32.8, CH               | 1.51, m                        | 32.8, CH               | 1.51, m                        |
| 16       | 19.2, CH <sub>3</sub>  | 0.79, 3H, d (6.6)              | 19.2, CH <sub>3</sub>  | 0.78, 3H, d (6.6)              |
| 17       | 20.7, CH <sub>3</sub>  | 0.84, 3H, d (6.6)              | 20.7, CH <sub>3</sub>  | 0.81, 3H, d (6.6)              |
| 18       | 28.9, CH <sub>3</sub>  | 1.39, 3H, s                    | 28.9, CH <sub>3</sub>  | 1.41, 3H, s                    |
| 19       | 60.0, CH <sub>2</sub>  | 3.57, d (11.1), 3.51, d (11.1) | 15.1, CH <sub>3</sub>  | 1.53, 3H, s                    |
| 20       | 16.1, CH <sub>3</sub>  | 1.76, 3H, s                    | 60.1, CH <sub>3</sub>  | 3.67, d (11.2), 3.61, d (11.2) |

<sup>a</sup> In CDCl<sub>3</sub>, 400 MHz for  $^1\text{H}$  and  $^{13}\text{C}$  NMR. Coupling constants ( $J$ ) are in Hz. Carbon multiplicities were determined by APT experiments, qC = quaternary, CH = methine, CH<sub>2</sub> = methylene, CH<sub>3</sub> = methyl carbons.

**Table 7.**  $^{13}\text{C}$  and  $^1\text{H}$  NMR Data of Cembranoids **14** and **15**.<sup>a</sup>

| position | <b>14</b> <sup>4</sup>      |                                      | <b>15</b> <sup>4</sup>      |                                      |
|----------|-----------------------------|--------------------------------------|-----------------------------|--------------------------------------|
|          | $\delta_{\text{C}}$ , mult. | $\delta_{\text{H}}$ ( <i>J</i> , Hz) | $\delta_{\text{C}}$ , mult. | $\delta_{\text{H}}$ ( <i>J</i> , Hz) |
| 1        | 46.1 CH                     | 1.62, m                              | 41.6 CH                     | 2.17, m                              |
| 2        | 133.7 CH                    | 5.42, dd (8.8, 7.0)                  | 42.7 CH                     | 2.75, dd (7.3, 4.0)                  |
| 3        | 135.4 CH                    | 5.44, d (8.8)                        | 115.3 CH                    | 5.45, d (7.3)                        |
| 4        | 76.3 qC                     | -                                    | 131.9 qC                    | -                                    |
| 5        | 57.1 CH <sub>2</sub>        | 2.83, d (11.7)<br>2.46, d (11.7)     | 122.7 CH                    | 5.97, s                              |
| 6        | 199.0 qC                    | -                                    | 132.3 qC                    | -                                    |
| 7        | 126.6 CH                    | 6.02, s                              | 126.8 CH                    | 5.56, s                              |
| 8        | 157.2 qC                    | -                                    | 137.8 qC                    | -                                    |
| 9        | 40.7 CH <sub>2</sub>        | 2.13, 2H, m                          | 31.4 CH <sub>2</sub>        | 1.93, m 2.74, m                      |
| 10       | 23.9 CH <sub>2</sub>        | 2.26, 2H, m                          | 25.4 CH <sub>2</sub>        | 1.95, m 2.03, m                      |
| 11       | 123.1 CH                    | 4.89, dd (7.7, 7.7)                  | 126.9 CH                    | 5.18, dd (7.7, 7.7)                  |
| 12       | 134.2 qC                    | -                                    | 134.4 qC                    | -                                    |
| 13       | 37.0 CH <sub>2</sub>        | 2.01, 2H, m                          | 39.2 CH <sub>2</sub>        | 1.27, 2H, m                          |
| 14       | 27.6 CH <sub>2</sub>        | 1.39, 2H, m                          | 22.9 CH <sub>2</sub>        | 1.57, 2H, m                          |
| 15       | 33.3 CH                     | 1.82, m                              | 27.9 CH                     | 2.00, m                              |
| 16       | 19.3 CH <sub>3</sub>        | 0.84, 3H, d (6.6)                    | 17.2 CH <sub>3</sub>        | 0.81, 3H, d (7.0)                    |
| 17       | 20.2 CH <sub>3</sub>        | 0.86, 3H, d (6.6)                    | 21.6 CH <sub>3</sub>        | 0.92, 3H, d (7.0)                    |
| 18       | 21.0 CH <sub>3</sub>        | 1.29, 3H, s                          | 22.0 CH <sub>3</sub>        | 1.83, 3H, (1.4)                      |
| 19       | 18.7 CH <sub>3</sub>        | 2.13, 3H, d (1.1)                    | 24.1 CH <sub>3</sub>        | 1.84, 3H, d (1.5)                    |
| 20       | 15.7 CH <sub>3</sub>        | 1.56, 3H, s                          | 16.8 CH <sub>3</sub>        | 1.63, 3H, s                          |
| 21       | 49.8 CH <sub>3</sub>        | 3.13, 3H, s                          | -                           | -                                    |

<sup>a</sup>In CDCl<sub>3</sub>, 400 MHz for  $^1\text{H}$  and  $^{13}\text{C}$  NMR. Coupling constants (*J*) are in Hz. Carbon multiplicities were determined by APT experiments, qC = quaternary, CH = methine, CH<sub>2</sub> = methylene, CH<sub>3</sub> = methyl carbons.



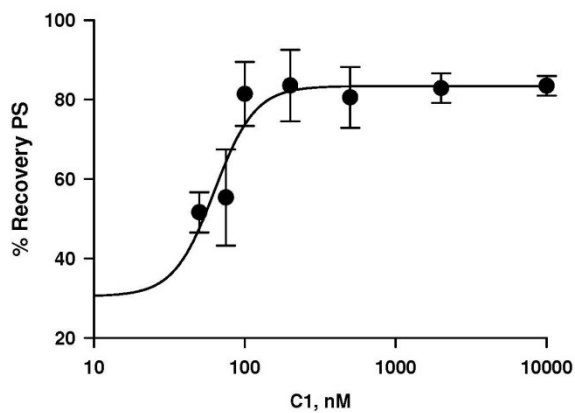

| R    | Rsqr | Adj Rsqr | Standard Error of Estimate |
|------|------|----------|----------------------------|
| 0.97 | 0.94 | 0.90     | 6.44                       |

|                  | Coefficient | Std. Error | t  | P       |
|------------------|-------------|------------|----|---------|
| min              | 30          | 6          | 5  | 0.009   |
| max              | 83          | 3          | 24 | <0.0001 |
| EC <sub>50</sub> | 63          | 9          | 7  | 0.0025  |
| Hillslope        | 3           | 1          | 2  | 0.0855  |

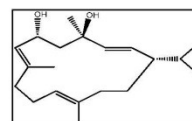

**Figure S1.** EC<sub>50</sub> data of **1**.

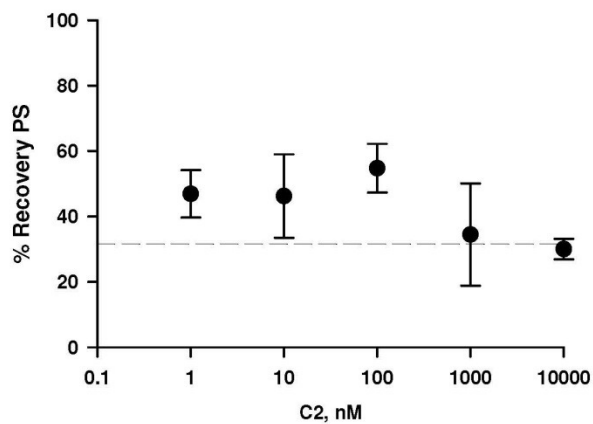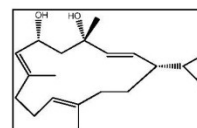

**Figure S2.** EC<sub>50</sub> data of **2**.

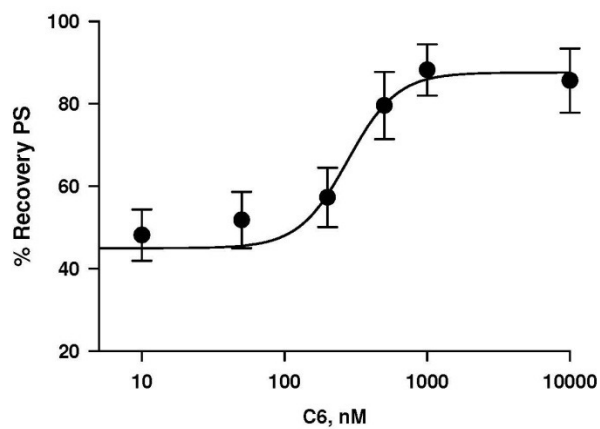

|                  | R           | Rsqr       | Adj Rsqr | Standard Error of Estimate |
|------------------|-------------|------------|----------|----------------------------|
|                  | 0.97        | 0.94       | 0.89     | 6.81                       |
|                  | Coefficient | Std. Error | t        | P                          |
| min              | 45          | 4          | 11       | 0.0016                     |
| max              | 88          | 6          | 15       | 0.0006                     |
| EC <sub>50</sub> | 277         | 87         | 3        | 0.0492                     |
| Hillslope        | 3           | 2          | 2        | 0.2123                     |

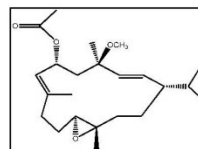

Figure S3. EC<sub>50</sub> data of 6.

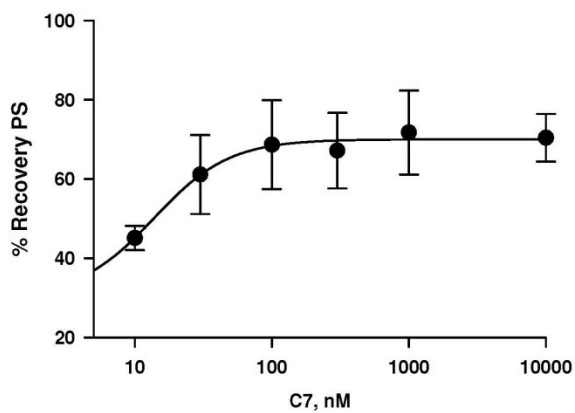

|                  | R           | Rsqr       | Adj Rsqr | Standard Error of Estimate |
|------------------|-------------|------------|----------|----------------------------|
|                  | 1.00        | 0.99       | 0.99     | 1.81                       |
|                  | Coefficient | Std. Error | t        | P                          |
| min              | 30          | 2          | 17       | 0.0005                     |
| max              | 70          | 1          | 67       | <0.0001                    |
| EC <sub>50</sub> | 14          | 2          | 8        | 0.0041                     |
| Hillslope        | 2           | 0          | 5        | 0.0132                     |

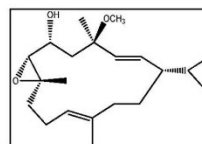

Figure S4. EC<sub>50</sub> data of 7.

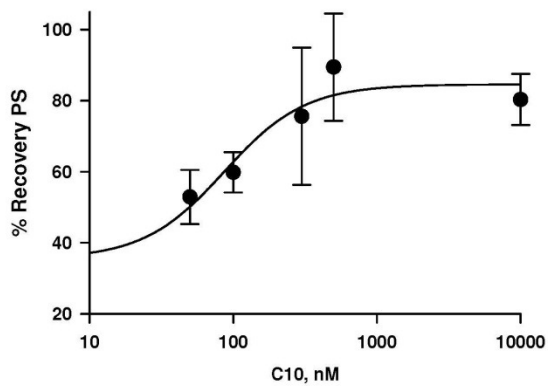

| R    | Rsqr | Adj Rsqr | Standard Error of Estimate |
|------|------|----------|----------------------------|
| 0.97 | 0.95 | 0.87     | 7.23                       |

|                  | Coefficient | Std. Error | t  | P     |
|------------------|-------------|------------|----|-------|
| min              | 35          | 7          | 5  | 0.038 |
| max              | 85          | 7          | 13 | 0.006 |
| EC <sub>50</sub> | 87          | 36         | 2  | 0.138 |
| Hillslope        | 2           | 1          | 2  | 0.238 |

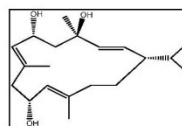

Figure S5. EC<sub>50</sub> data of 10.

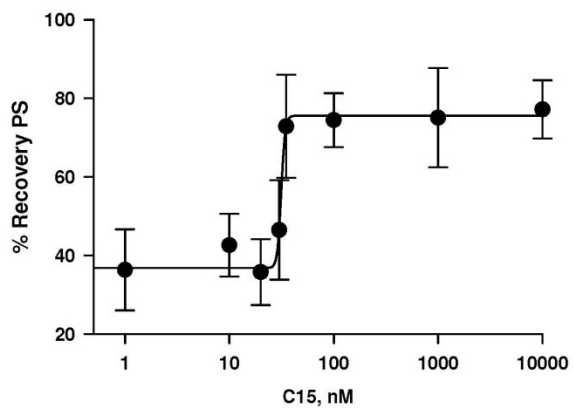

| R    | Rsqr | Adj Rsqr | Standard Error of Estimate |
|------|------|----------|----------------------------|
| 0.99 | 0.98 | 0.97     | 3.37                       |

|                  | Coefficient | Std. Error | t  | P       |
|------------------|-------------|------------|----|---------|
| min              | 37          | 2          | 22 | <0.0001 |
| max              | 76          | 2          | 39 | <0.0001 |
| EC <sub>50</sub> | 31          | 1          | 40 | <0.0001 |
| Hillslope        | 24.0        | 10.2       | 2  | 0.0659  |

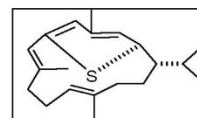

Figure S6. EC<sub>50</sub> data of 15.

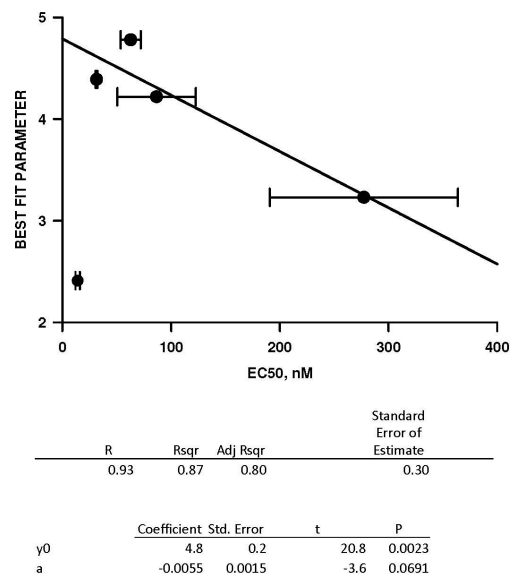

**Figure S7.** Validation of  $EC_{50}$  values using QSAR data.

ERROR: undefined  
OFFENDING COMMAND: '~

STACK:
